# Supplementary material for: Timing-Dependent Actions of NGF Required for Cell Differentiation
Source: PubMed Central journal article supplement (PMC2814856; doi:10.1371/journal.pone.0009011), 2010-02-02

Figure S6.

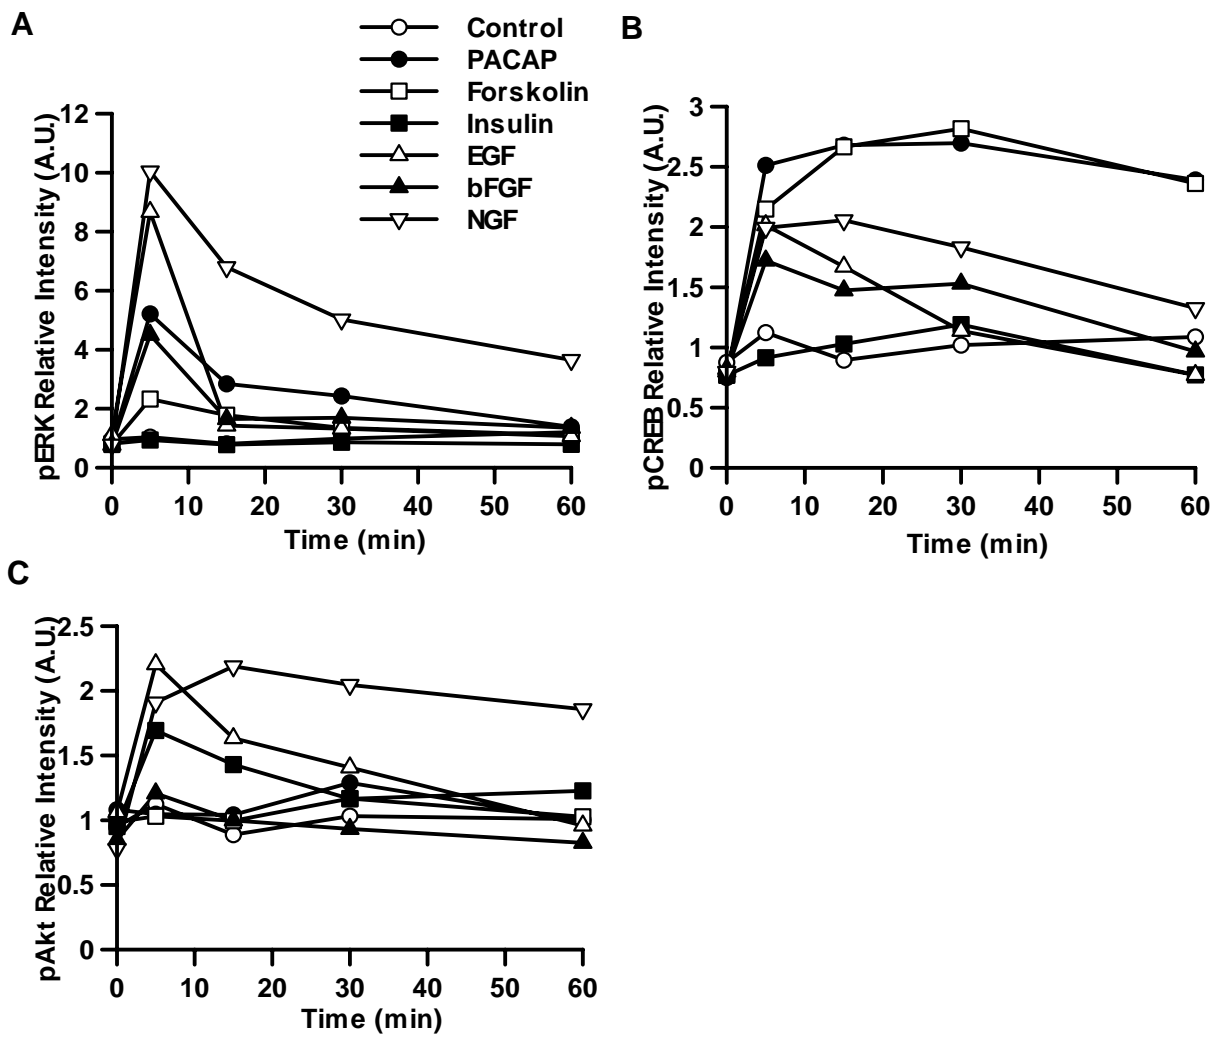

D

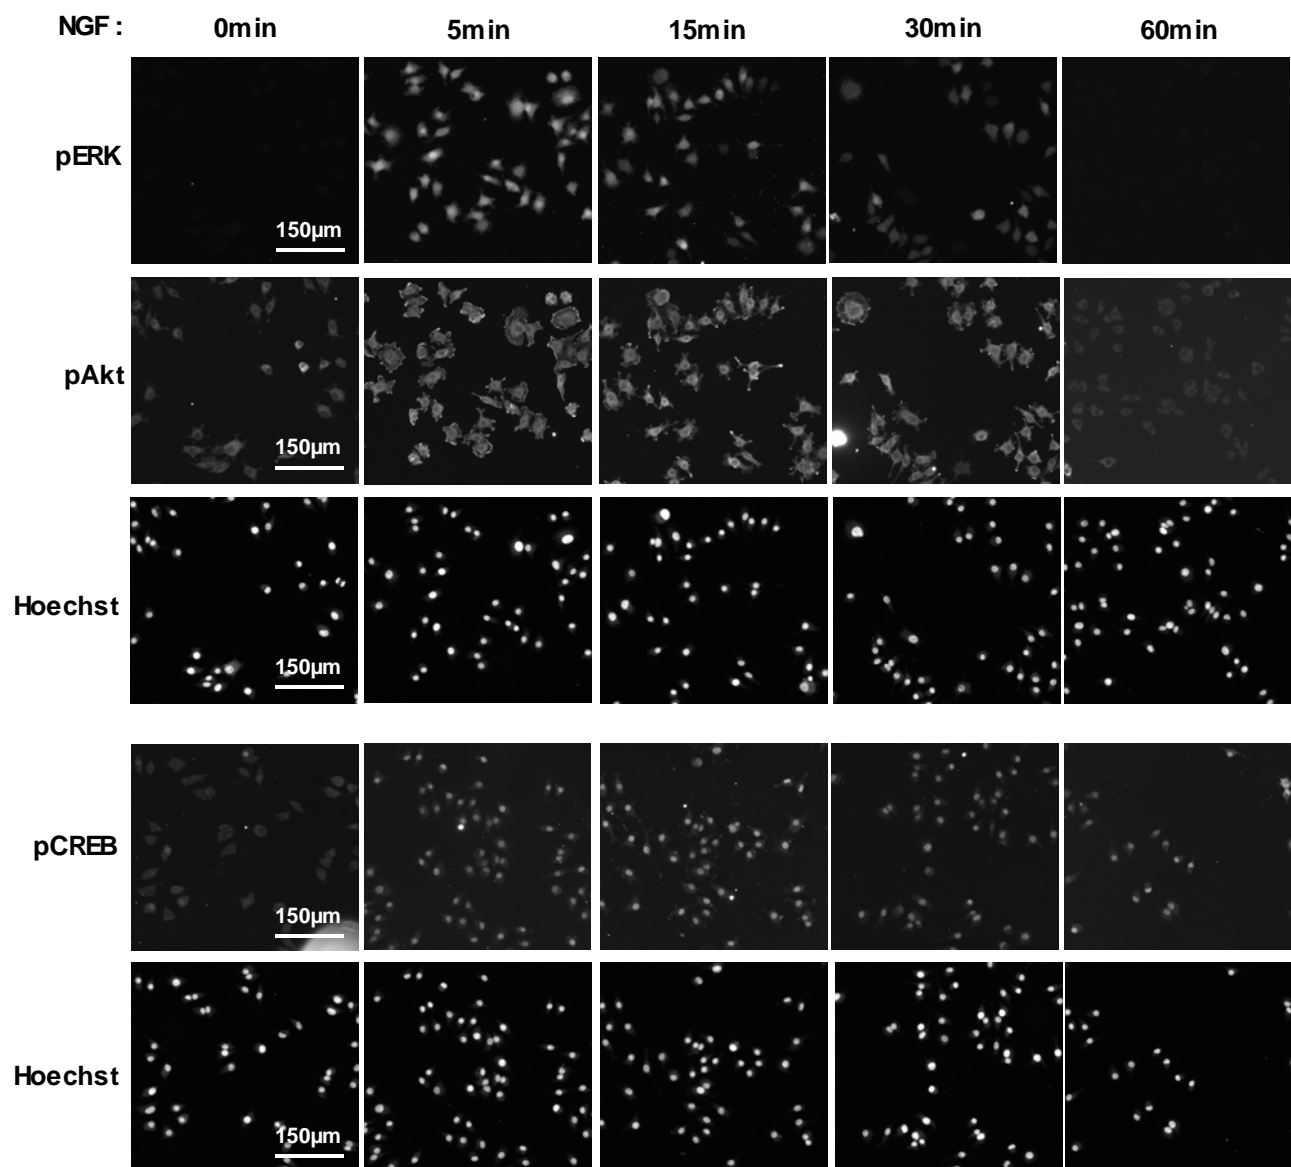

E

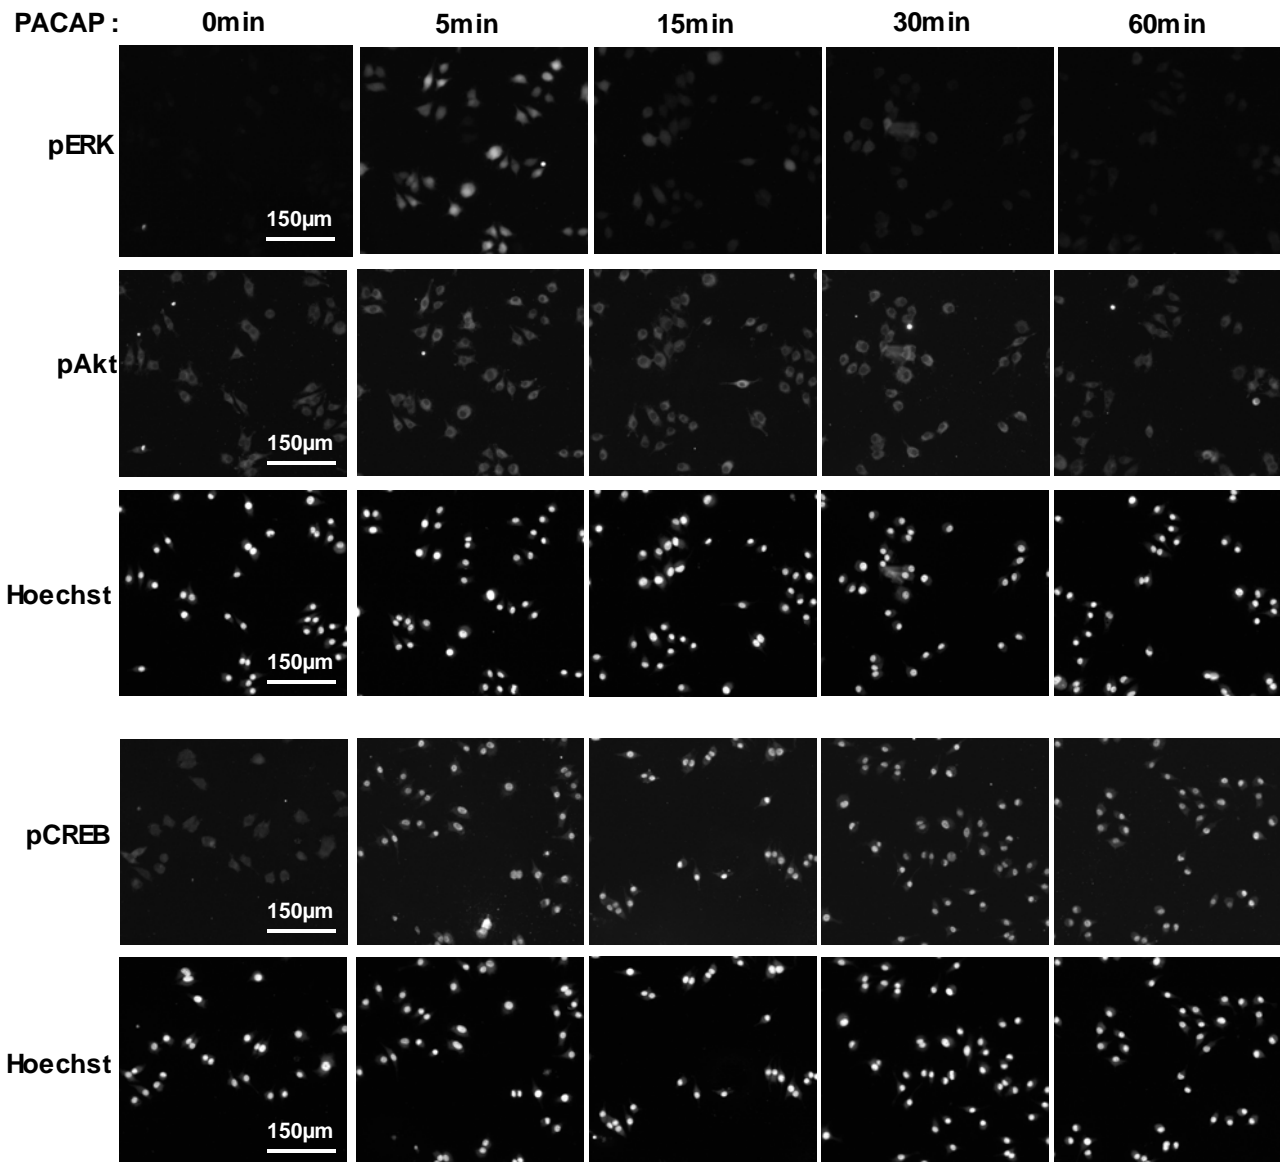

**F**

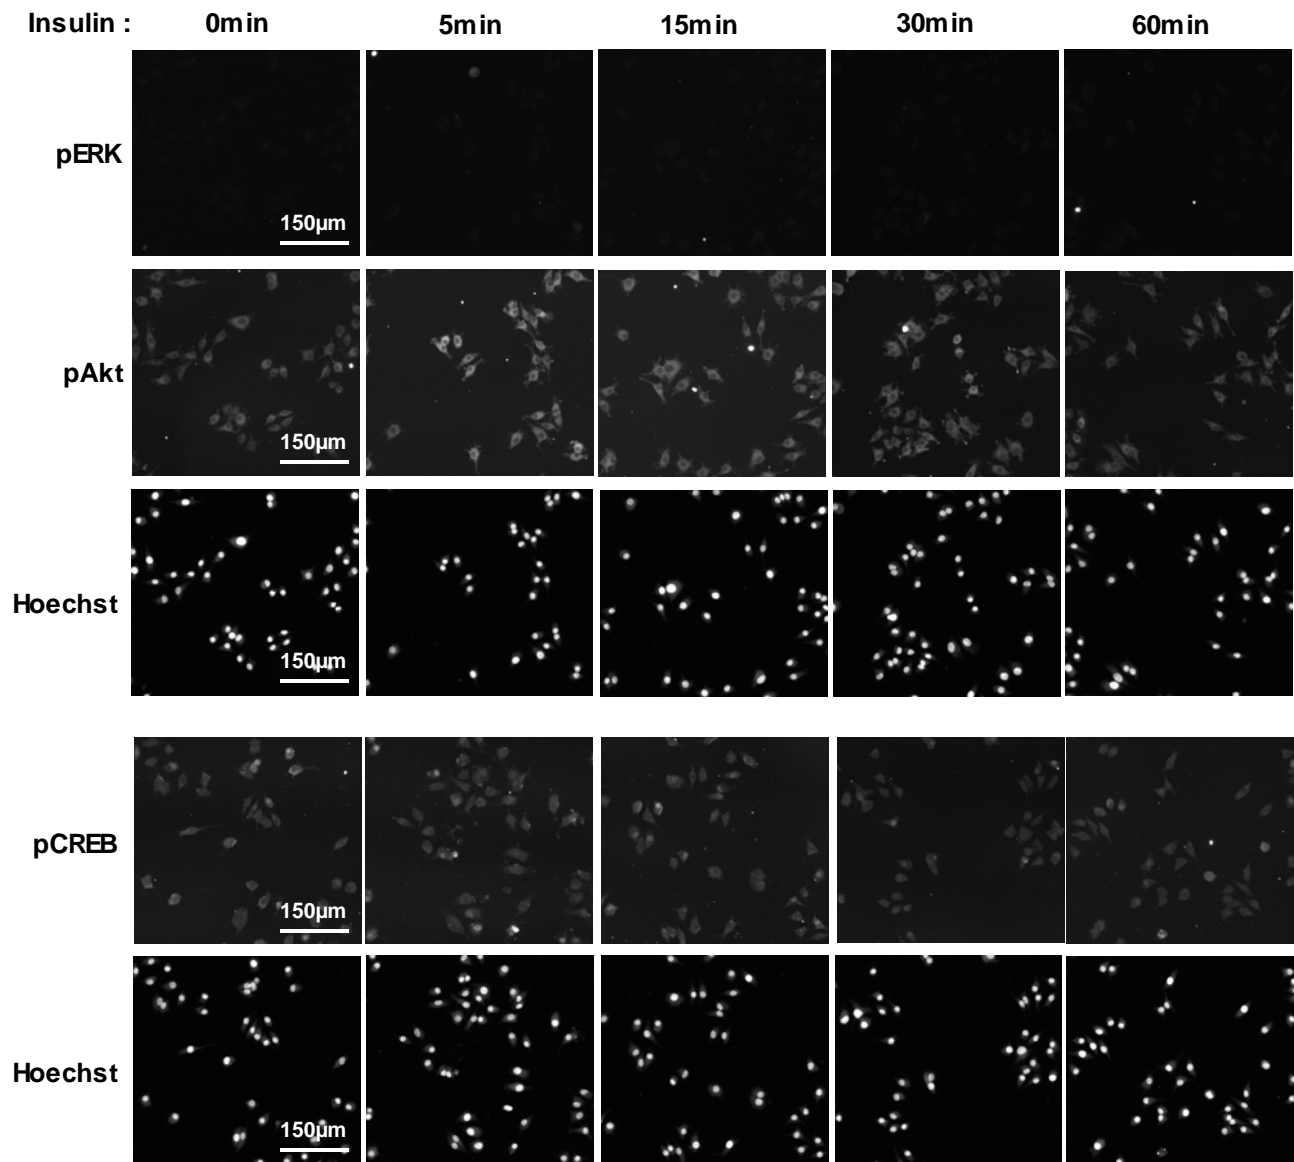

**G**

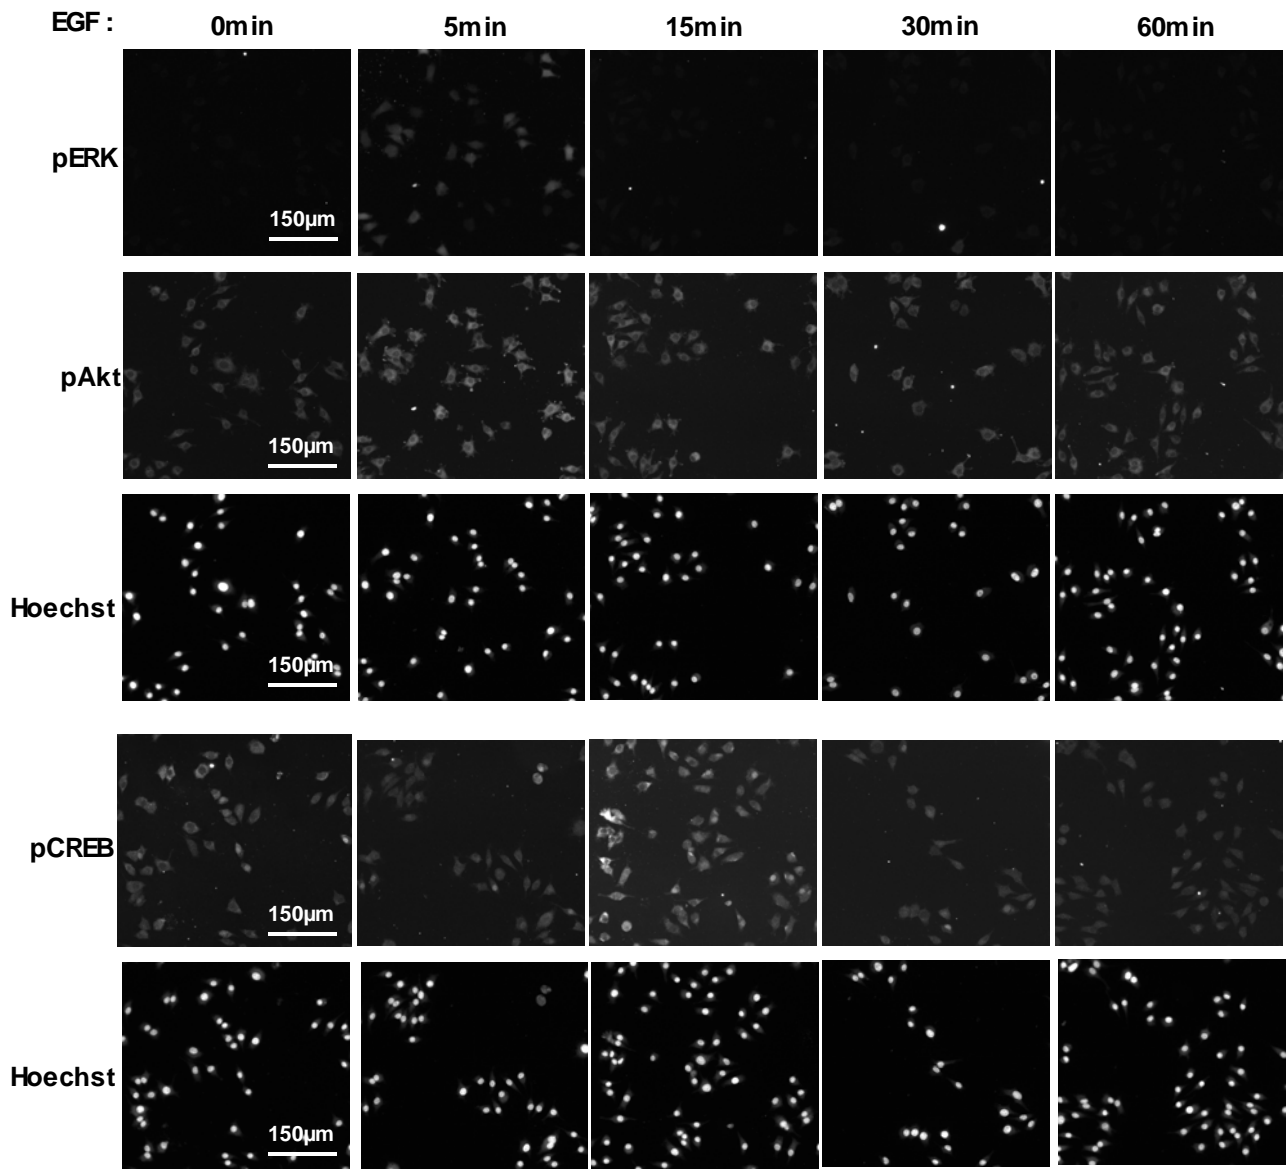

H

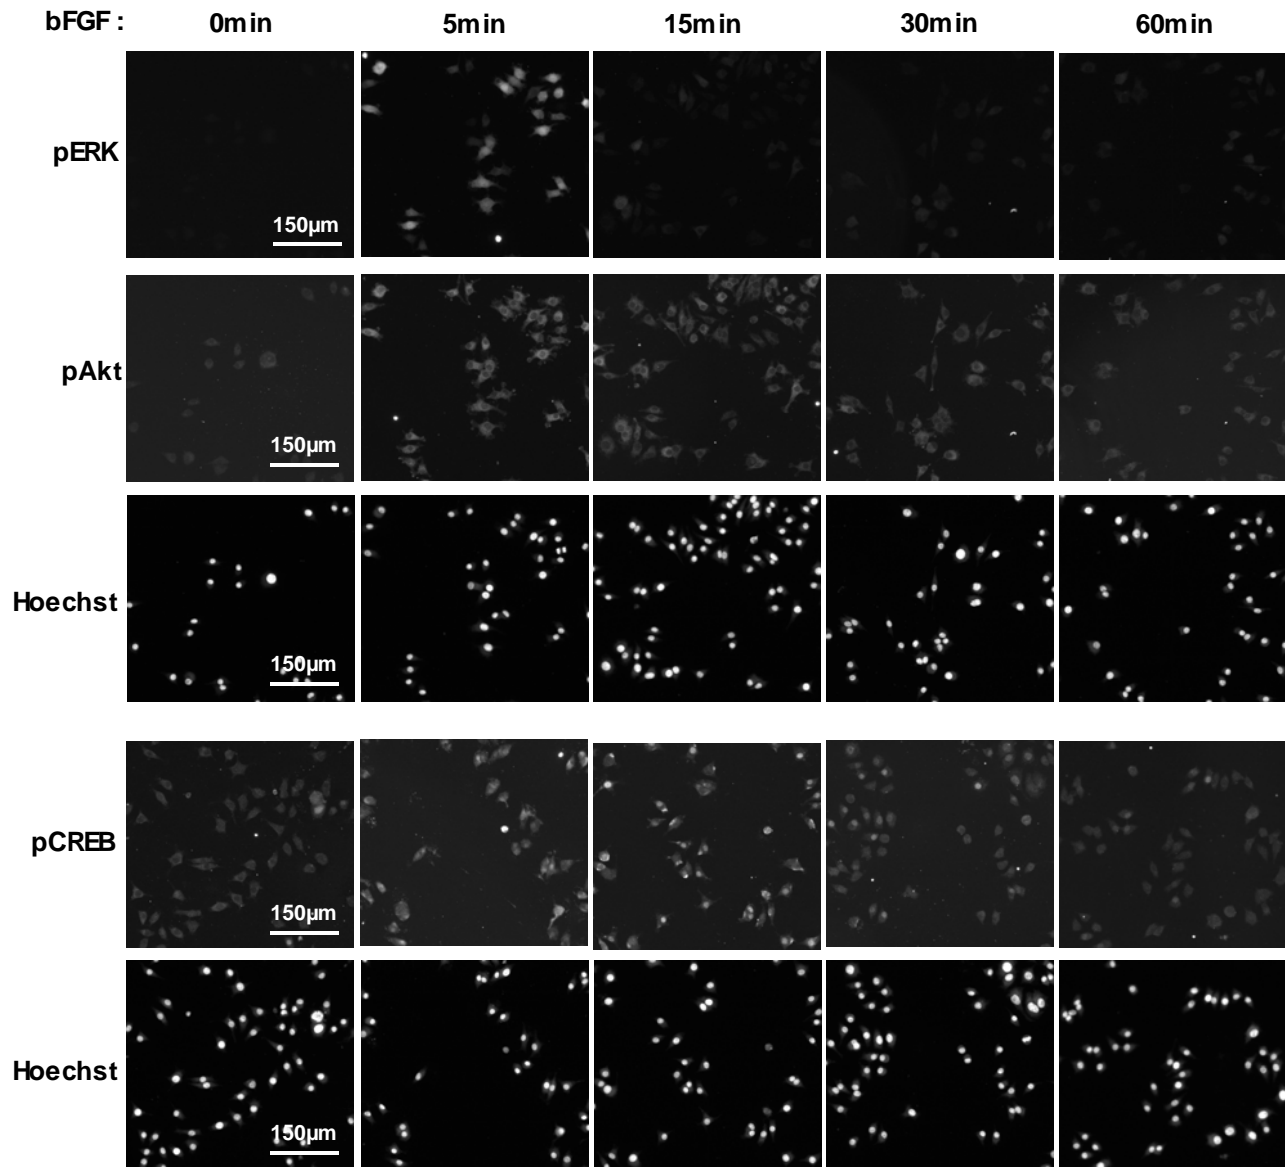

I

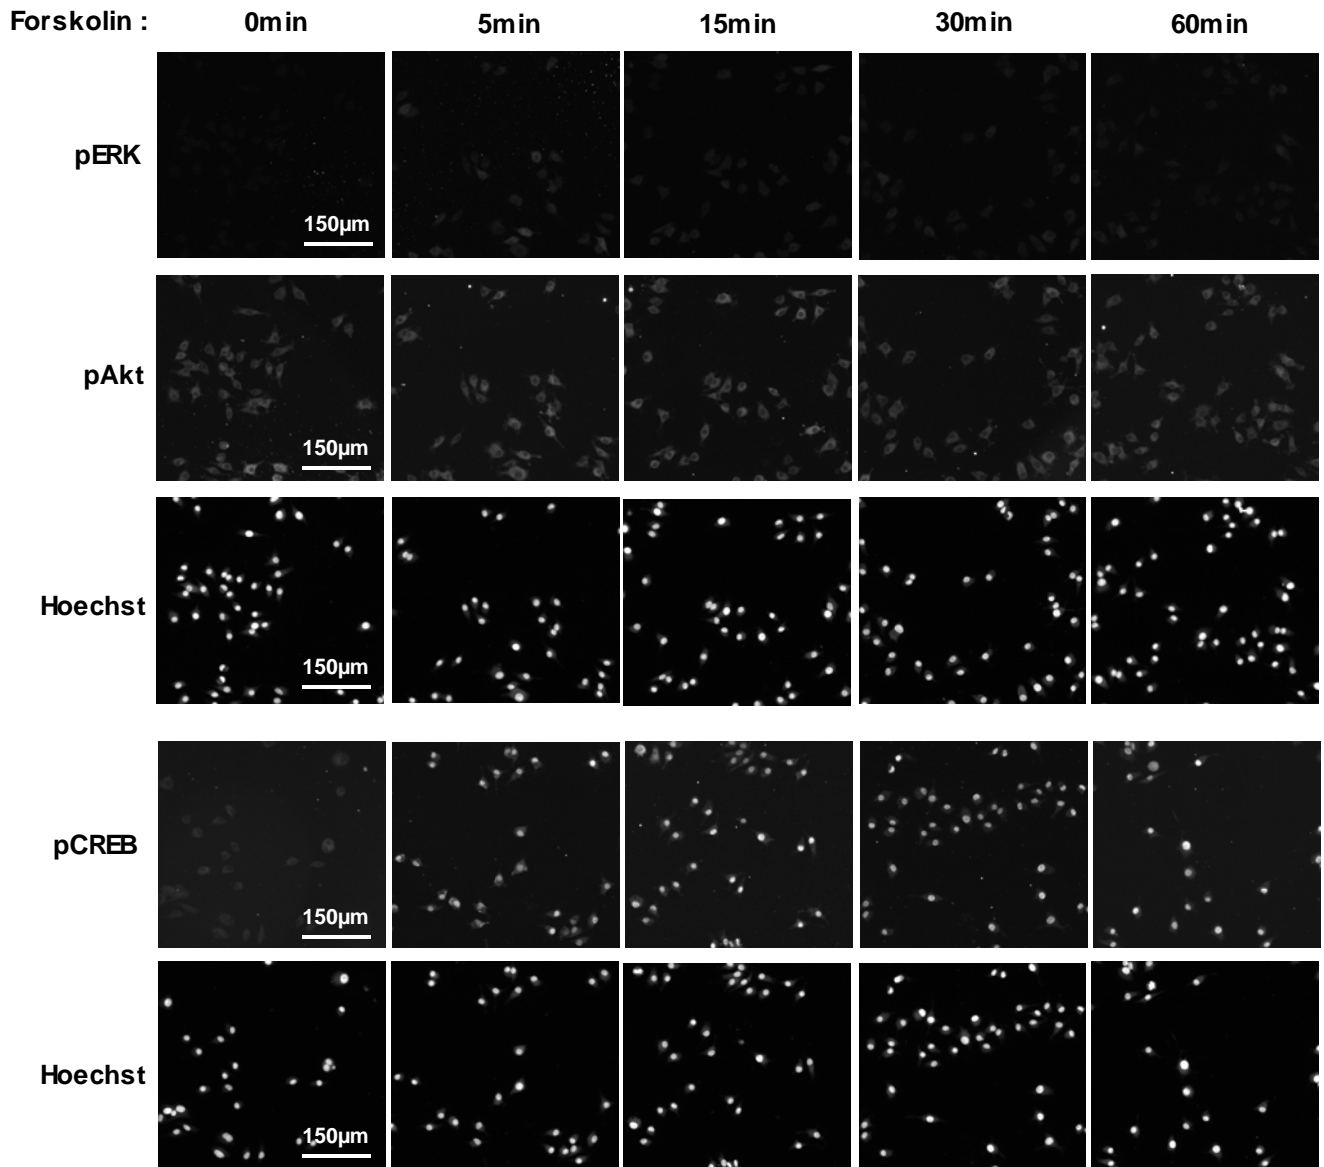

Supplement: pone.0009011.s006.pdf [file pone.0009011.s006.pdf]
